# Supplementary material for: Differential miRNA and Protein Expression Reveals miR-1285, Its Targets TGM2 and CDH-1 as Well as CD166 and S100A13 as Potential New Biomarkers in Patients with Diabetes Mellitus and Pancreatic Adenocarcinoma
Source: Preprints.org preprint supplement (doi:10.20944/preprints202406.1734.v1), 2024-06-25
Supplement: Supplementary file 1 [file supplementary]

**Table S1: Proteins with differential abundance in group1 samples and group2 samples.** Proteins with a positive logFC value had a higher abundance in group1 samples, proteins with a negative value in group2 samples. In addition, p values adjusted for multiple testing are listed. The Uniprot-Identifier links to the Uniprot- Entry.

| Protein | | AntibodyID | | | | | logFC | | AveExp | | adj.P.Val | | Uniprot-Entry | |
| --- | --- | --- | --- | --- | --- | --- | --- | --- | --- | --- | --- | --- | --- | --- |
|  | |  | | | | |  | |  | |  | |  | |
| TRY3 | | ab2797 | | | | | 4.12 | | 14.20 | | 1.5e-02 | | [P35030](http://www.uniprot.org/uniprot/P35030) | |
| TFF3 | | ab2745 | | | | | 3.48 | | 12.66 | | 5.8e-06 | | [Q07654](http://www.uniprot.org/uniprot/Q07654) | |
| TSN8 | | ab1163 | | | | | 3.25 | | 13.43 | | 2.5e-04 | | [P19075](http://www.uniprot.org/uniprot/P19075) | |
| KI67 | | ab1337 | | | | | 2.88 | | 12.94 | | 2.2e-03 | | [P46013](http://www.uniprot.org/uniprot/P46013) | |
| ISK1 | | ab2000 | | | | | 2.87 | | 14.83 | | 3.1e-02 | | [P00995](http://www.uniprot.org/uniprot/P00995) | |
| TFF2 | | ab1895 | | | | | 2.79 | | 11.92 | | 8.9e-04 | | [Q03403](http://www.uniprot.org/uniprot/Q03403) | |
| S100P | | ab1062 | | | | | 2.46 | | 13.17 | | 4.7e-03 | | [P25815](http://www.uniprot.org/uniprot/P25815) | |
| CCNB1 | | ab1233 | | | | | 2.24 | | 10.53 | | 9.8e-05 | | [P14635](http://www.uniprot.org/uniprot/P14635) | |
| RL18 | | ab1280 | | | | | 2.17 | | 13.28 | | 5.8e-03 | | [Q07020](http://www.uniprot.org/uniprot/Q07020) | |
| RGMC | | ab2819 | | | | | 2.10 | | 13.04 | | 9.8e-05 | | [Q6ZVN8](http://www.uniprot.org/uniprot/Q6ZVN8) | |
| AGR2 | | ab1313 | | | | | 2.10 | | 13.22 | | 9.9e-03 | | [O95994](http://www.uniprot.org/uniprot/O95994) | |
| SDC4 | | ab1963 | | | | | 2.08 | | 10.74 | | 7.1e-03 | | [P31431](http://www.uniprot.org/uniprot/P31431) | |
| CEAM6 | | ab1633 | | | | | 1.90 | | 12.72 | | 2.0e-02 | | [P40199](http://www.uniprot.org/uniprot/P40199) | |
| CD166 | | ab2246 | | | | | 1.85 | | 13.87 | | 1.6e-03 | | [Q13740](http://www.uniprot.org/uniprot/Q13740) | |
| HAVR1 | | ab2265 | | | | | 1.84 | | 9.67 | | 5.8e-03 | | [Q96D42](http://www.uniprot.org/uniprot/Q96D42) | |
| AKT3 | | ab1106 | | | | | 1.81 | | 12.98 | | 1.9e-04 | | [Q9Y243](http://www.uniprot.org/uniprot/Q9Y243) | |
| CEAM1,3,5,6,8 | | ab1628 | | | | | 1.78 | | 11.60 | | 7.0e-03 | | [P13688](http://www.uniprot.org/uniprot/P13688) | |
| OLR1 | | ab1989 | | | | | 1.77 | | 14.19 | | 1.2e-04 | | [P78380](http://www.uniprot.org/uniprot/P78380) | |
| PRDX4 | | ab1318 | | | | | 1.74 | | 12.95 | | 8.8e-03 | | [Q13162](http://www.uniprot.org/uniprot/Q13162) | |
| ENOG | | ab2054 | | | | | 1.73 | | 14.26 | | 8.8e-03 | | [P09104](http://www.uniprot.org/uniprot/P09104) | |
| MET | | ab1790 | | | | | 1.69 | | 11.93 | | 4.7e-03 | | [P08581](http://www.uniprot.org/uniprot/P08581) | |
| ING1 | | ab1032 | | | | | 1.69 | | 14.37 | | 8.8e-03 | | [Q9UK53](http://www.uniprot.org/uniprot/Q9UK53) | |
| CEAM5,8 | | ab1634 | | | | | 1.68 | | 12.92 | | 6.9e-04 | | [P06731](http://www.uniprot.org/uniprot/P06731) | |
| CXL13 | | ab2276 | | | | | 1.64 | | 9.72 | | 9.1e-03 | | [O43927](http://www.uniprot.org/uniprot/O43927) | |
| MERTK | | ab2456 | | | | | 1.60 | | 11.00 | | 1.1e-03 | | [Q12866](http://www.uniprot.org/uniprot/Q12866) | |
| LEG9 | | ab2776 | | | | | 1.57 | | 14.30 | | 8.9e-03 | | [O00182](http://www.uniprot.org/uniprot/O00182) | |
| SOX9 | | ab1162 | | | | | 1.57 | | 11.09 | | 3.0e-02 | | [P48436](http://www.uniprot.org/uniprot/P48436) | |
| BCL2 | | ab0620 | | | | | 1.54 | | 12.72 | | 4.7e-03 | | [P10415](http://www.uniprot.org/uniprot/P10415) | |
| EGFR | | ab2454 | | | | | 1.54 | | 12.75 | | 1.6e-02 | | [P00533](http://www.uniprot.org/uniprot/P00533) | |
| EPCAM | | ab1987 | | | | | 1.53 | | 11.15 | | 7.1e-03 | | [P16422](http://www.uniprot.org/uniprot/P16422) | |
| MUC1 | | ab1087 | | | | | 1.50 | | 12.25 | | 5.7e-04 | | [P15941](http://www.uniprot.org/uniprot/P15941) | |
| MK | | ab2370 | | | | | 1.48 | | 14.40 | | 9.2e-03 | | [P21741](http://www.uniprot.org/uniprot/P21741) | |
| CD63 | | ab1468 | | | | | 1.47 | | 10.87 | | 1.6e-02 | | [P08962](http://www.uniprot.org/uniprot/P08962) | |
| ETV6 | | ab0999 | | | | | 1.45 | | 9.49 | | 6.8e-03 | | [P41212](http://www.uniprot.org/uniprot/P41212) | |
|  | | | | | |  |  | |  | |  | |  | |
| CXL16 | | | | | | ab2515 | 1.42 | | 11.43 | | 3.0e-02 | | [Q9H2A7](http://www.uniprot.org/uniprot/Q9H2A7) | |
| BDNF | | | | | | ab1502 | 1.39 | | 11.77 | | 4.7e-03 | | [P23560](http://www.uniprot.org/uniprot/P23560) | |
| ESR1 | | | | | | ab1339 | 1.39 | | 15.00 | | 1.8e-02 | | [P03372](http://www.uniprot.org/uniprot/P03372) | |
| LEG4 | | | | | | ab1108 | 1.38 | | 14.13 | | 5.0e-03 | | [P56470](http://www.uniprot.org/uniprot/P56470) | |
| CYTB | | | | | | ab1241 | 1.36 | | 14.43 | | 5.0e-03 | | [P04080](http://www.uniprot.org/uniprot/P04080) | |
| LAMP1 | | | | | | ab1625 | 1.34 | | 10.92 | | 3.2e-02 | | [P11279](http://www.uniprot.org/uniprot/P11279) | |
| IDS | | | | | | ab1837 | 1.31 | | 10.92 | | 2.0e-02 | | [P22304](http://www.uniprot.org/uniprot/P22304) | |
| CH60 | | | | | | ab1237 | 1.28 | | 12.27 | | 5.0e-03 | | [P10809](http://www.uniprot.org/uniprot/P10809) | |
| ELAF | | | | | | ab2052 | 1.27 | | 11.81 | | 3.3e-03 | | [P19957](http://www.uniprot.org/uniprot/P19957) | |
| IL27A | | | | | | ab1741 | 1.25 | | 9.99 | | 5.1e-03 | | [Q8NEV9](http://www.uniprot.org/uniprot/Q8NEV9) | |
| BLNK | | | | | | ab0976 | 1.25 | | 13.70 | | 1.5e-02 | | [Q8WV28](http://www.uniprot.org/uniprot/Q8WV28) | |
| 4F2 | | | | | | ab1480 | 1.25 | | 12.36 | | 2.0e-02 | | [P08195](http://www.uniprot.org/uniprot/P08195) | |
| CADH1 | | | | | | ab2412 | 1.25 | | 11.97 | | 3.8e-02 | | [P12830](http://www.uniprot.org/uniprot/P12830) | |
| BDNF | | | | | | ab2677 | 1.24 | | 13.11 | | 3.3e-03 | | [P23560](http://www.uniprot.org/uniprot/P23560) | |
| CXCR5 | | | | | | ab1059 | 1.24 | | 13.63 | | 7.3e-03 | | [P32302](http://www.uniprot.org/uniprot/P32302) | |
| IL23A | | | | | | ab2440 | 1.24 | | 9.68 | | 1.2e-02 | | [Q9NPF7](http://www.uniprot.org/uniprot/Q9NPF7) | |
| ITAL | | | | | | ab1384 | 1.23 | | 10.69 | | 4.7e-03 | | [P20701](http://www.uniprot.org/uniprot/P20701) | |
| GRAB | | | | | | ab2348 | 1.23 | | 10.69 | | 1.8e-02 | | [P10144](http://www.uniprot.org/uniprot/P10144) | |
| ACY1 | | | | | | ab2821 | 1.23 | | 12.26 | | 1.9e-02 | | [Q03154](http://www.uniprot.org/uniprot/Q03154) | |
| CDK4 | | | | | | ab1236 | 1.22 | | 10.28 | | 2.0e-02 | | [P11802](http://www.uniprot.org/uniprot/P11802) | |
| TREM1 | | | | | | ab2125 | 1.21 | | 10.41 | | 4.7e-03 | | [Q9NP99](http://www.uniprot.org/uniprot/Q9NP99) | |
| INHBA | | | | | | ab2176 | 1.21 | | 11.95 | | 8.8e-03 | | [P08476](http://www.uniprot.org/uniprot/P08476) | |
| IRF4 | | | | | | ab1010 | 1.19 | | 13.69 | | 2.0e-02 | | [Q15306](http://www.uniprot.org/uniprot/Q15306) | |
| STAT1 | | | | | | ab1151 | 1.18 | | 13.54 | | 5.4e-03 | | [P42224](http://www.uniprot.org/uniprot/P42224) | |
| ADAM9 | | | | | | ab1924 | 1.18 | | 12.11 | | 7.4e-03 | | [Q13443](http://www.uniprot.org/uniprot/Q13443) | |
| ANDR | | | | | | ab1336 | 1.18 | | 12.90 | | 1.8e-02 | | [P10275](http://www.uniprot.org/uniprot/P10275) | |
| SDC1 | | | | | | ab2308 | 1.17 | | 9.39 | | 3.3e-02 | | [P18827](http://www.uniprot.org/uniprot/P18827) | |
| ESM1 | | | | | | ab1147 | 1.16 | | 9.82 | | 2.9e-02 | | [Q9NQ30](http://www.uniprot.org/uniprot/Q9NQ30) | |
| RSPO3 | | | | | | ab2144 | 1.15 | | 9.85 | | 8.8e-03 | | [Q9BXY4](http://www.uniprot.org/uniprot/Q9BXY4) | |
| IRF2 | | | | | | ab1256 | 1.15 | | 10.42 | | 4.3e-02 | | [P14316](http://www.uniprot.org/uniprot/P14316) | |
| JAML | | | | | | ab1859 | 1.14 | | 10.47 | | 8.1e-03 | | [Q86YT9](http://www.uniprot.org/uniprot/Q86YT9) | |
| FSTL1 | | | | | | ab2750 | 1.14 | | 10.27 | | 3.4e-02 | | [Q12841](http://www.uniprot.org/uniprot/Q12841) | |
| SPB5 | | | | | | ab1320 | 1.13 | | 13.44 | | 4.7e-03 | | [P36952](http://www.uniprot.org/uniprot/P36952) | |
| VEGF165, VEGF121 | | | | | | ab2469 | 1.13 | | 10.33 | | 2.3e-02 | | [P15692](http://www.uniprot.org/uniprot/P15692) | |
| SPRC | | | | | | ab1026 | 1.13 | | 13.11 | | 3.3e-02 | | [P09486](http://www.uniprot.org/uniprot/P09486) | |
| PRS27 | | | | | | ab2050 | 1.12 | | 10.00 | | 8.8e-03 | | [Q9BQR3](http://www.uniprot.org/uniprot/Q9BQR3) | |
| CORIN | | | | | | ab1954 | 1.11 | | 13.67 | | 1.4e-02 | | [Q9Y5Q5](http://www.uniprot.org/uniprot/Q9Y5Q5) | |
| TR13C | | | | | | ab1084 | 1.10 | | 9.48 | | 4.5e-03 | | [Q96RJ3](http://www.uniprot.org/uniprot/Q96RJ3) | |
|  | |  | | | | |  | |  | |  | |  | |
| BMP4 | | ab1960 | | | | | 1.10 | | 10.00 | | 8.8e-03 | | [P12644](http://www.uniprot.org/uniprot/P12644) | |
| TGFA | | ab1818 | | | | | 1.09 | | 9.29 | | 8.5e-03 | | [P01135](http://www.uniprot.org/uniprot/P01135) | |
| GSTP1 | | ab1091 | | | | | 1.08 | | 13.14 | | 1.6e-02 | | [P09211](http://www.uniprot.org/uniprot/P09211) | |
| OTUB1 | | ab0026 | | | | | 1.06 | | 13.02 | | 4.4e-02 | | [Q96FW1](http://www.uniprot.org/uniprot/Q96FW1) | |
| ECHM | | ab0593 | | | | | 1.04 | | 12.65 | | 5.1e-03 | | [P30084](http://www.uniprot.org/uniprot/P30084) | |
| DDB2 | | ab1119 | | | | | 1.04 | | 11.17 | | 1.8e-02 | | [Q92466](http://www.uniprot.org/uniprot/Q92466) | |
| GRN | | ab2704 | | | | | 1.03 | | 12.81 | | 1.6e-02 | | [P28799](http://www.uniprot.org/uniprot/P28799) | |
| BECN1 | | ab1146 | | | | | 1.03 | | 14.32 | | 3.9e-02 | | [Q14457](http://www.uniprot.org/uniprot/Q14457) | |
| KPCG | | ab1260 | | | | | 1.00 | | 9.79 | | 2.3e-02 | | [P05129](http://www.uniprot.org/uniprot/P05129) | |
| CCL20 | | ab1598 | | | | | 0.99 | | 10.90 | | 3.7e-02 | | [P78556](http://www.uniprot.org/uniprot/P78556) | |
| CD244 | | ab2157 | | | | | 0.98 | | 9.60 | | 3.0e-02 | | [Q9BZW8](http://www.uniprot.org/uniprot/Q9BZW8) | |
| CATH | | ab2698 | | | | | 0.95 | | 12.61 | | 1.1e-02 | | [P09668](http://www.uniprot.org/uniprot/P09668) | |
| HMGA1 | | ab1081 | | | | | 0.95 | | 10.13 | | 1.7e-02 | | [P17096](http://www.uniprot.org/uniprot/P17096) | |
| PSA2 | | ab2288 | | | | | 0.95 | | 11.08 | | 3.3e-02 | | [P25787](http://www.uniprot.org/uniprot/P25787) | |
| PD1L2 | | ab1020 | | | | | 0.94 | | 13.12 | | 4.7e-02 | | [Q9BQ51](http://www.uniprot.org/uniprot/Q9BQ51) | |
| TLR3 | | ab2700 | | | | | 0.93 | | 13.99 | | 4.7e-03 | | [O15455](http://www.uniprot.org/uniprot/O15455) | |
| ANGL3 | | ab2823 | | | | | 0.91 | | 12.82 | | 1.6e-02 | | [Q9Y5C1](http://www.uniprot.org/uniprot/Q9Y5C1) | |
| TNR25 | | ab2092 | | | | | 0.91 | | 10.16 | | 3.9e-02 | | [Q93038](http://www.uniprot.org/uniprot/Q93038) | |
| ITA6 | | ab1566 | | | | | 0.84 | | 13.13 | | 1.7e-02 | | [P23229](http://www.uniprot.org/uniprot/P23229) | |
| TNR17 | | ab2227 | | | | | 0.82 | | 10.42 | | 1.6e-02 | | [Q02223](http://www.uniprot.org/uniprot/Q02223) | |
| TNR21 | | ab2145 | | | | | 0.77 | | 9.91 | | 3.1e-02 | | [O75509](http://www.uniprot.org/uniprot/O75509) | |
| GDNF | | ab1777 | | | | | 0.66 | | 13.24 | | 3.7e-02 | | [P39905](http://www.uniprot.org/uniprot/P39905) | |
| PLCG2 | | ab0588 | | | | | -0.69 | | 11.41 | | 3.8e-02 | | [P16885](http://www.uniprot.org/uniprot/P16885) | |
| CLD4 | | ab0638 | | | | | -0.78 | | 9.79 | | 7.4e-03 | | [O14493](http://www.uniprot.org/uniprot/O14493) | |
| TGFB1 | | ab1595 | | | | | -0.82 | | 12.34 | | 1.6e-02 | | [P01137](http://www.uniprot.org/uniprot/P01137) | |
| EGLN | | ab1483 | | | | | -0.84 | | 13.97 | | 1.5e-02 | | [P17813](http://www.uniprot.org/uniprot/P17813) | |
| UB2J1 | | ab1303 | | | | | -0.86 | | 15.64 | | 1.4e-02 | | [Q9Y385](http://www.uniprot.org/uniprot/Q9Y385) | |
| PEDF | | ab1783 | | | | | -0.96 | | 14.44 | | 8.8e-03 | | [P36955](http://www.uniprot.org/uniprot/P36955) | |
| KLOTB | | ab2691 | | | | | -0.99 | | 15.67 | | 7.0e-03 | | [Q86Z14](http://www.uniprot.org/uniprot/Q86Z14) | |
| CR2 | | ab1533 | | | | | -1.01 | | 13.24 | | 1.2e-02 | | [P20023](http://www.uniprot.org/uniprot/P20023) | |
| CEAM5 | | ab2720 | | | | | -1.02 | | 15.51 | | 4.5e-03 | | [P06731](http://www.uniprot.org/uniprot/P06731) | |
| DKK3 | | ab1748 | | | | | -1.04 | | 15.43 | | 4.7e-03 | | [Q9UBP4](http://www.uniprot.org/uniprot/Q9UBP4) | |
| GSTM4 | | ab1253 | | | | | -1.06 | | 15.47 | | 4.7e-03 | | [Q03013](http://www.uniprot.org/uniprot/Q03013) | |
| FGF1 | | ab1055 | | | | | -1.08 | | 11.26 | | 2.5e-02 | | [P05230](http://www.uniprot.org/uniprot/P05230) | |
| CSF1 | | ab1957 | | | | | -1.09 | | 15.31 | | 7.4e-03 | | [P09603](http://www.uniprot.org/uniprot/P09603) | |
| PECA1 | | ab2473 | | | | | -1.10 | | 12.30 | | 8.3e-03 | | [P16284](http://www.uniprot.org/uniprot/P16284) | |
| SEM3E | | ab1913 | | | | | -1.10 | | 12.97 | | 4.3e-02 | | [O15041](http://www.uniprot.org/uniprot/O15041) | |
| GNLY | | ab2801 | | | | | -1.11 | | 15.21 | | 3.8e-02 | | [P22749](http://www.uniprot.org/uniprot/P22749) | |
|  | | | |  | | |  | |  | |  | |  | |
| ULBP1 | | | | ab2753 | | | -1.12 | | 15.54 | | 4.7e-03 | | [Q9BZM6](http://www.uniprot.org/uniprot/Q9BZM6) | |
| MEP1A | | | | ab2805 | | | -1.15 | | 15.15 | | 7.3e-04 | | [Q16819](http://www.uniprot.org/uniprot/Q16819) | |
| PD1L1 | | | | ab0973 | | | -1.15 | | 13.36 | | 3.1e-02 | | [Q9NZQ7](http://www.uniprot.org/uniprot/Q9NZQ7) | |
| P2RX1 | | | | ab1141 | | | -1.16 | | 9.16 | | 4.0e-02 | | [P51575](http://www.uniprot.org/uniprot/P51575) | |
| TPM2 | | | | ab1078 | | | -1.17 | | 9.44 | | 3.8e-02 | | [P07951](http://www.uniprot.org/uniprot/P07951) | |
| PD1L2 | | | | ab2734 | | | -1.18 | | 12.30 | | 5.4e-03 | | [Q9BQ51](http://www.uniprot.org/uniprot/Q9BQ51) | |
| MAGA4 | | | | ab1261 | | | -1.21 | | 14.72 | | 5.8e-03 | | [P43358](http://www.uniprot.org/uniprot/P43358) | |
| KLK3 | | | | ab1879 | | | -1.21 | | 14.19 | | 8.8e-03 | | [P07288](http://www.uniprot.org/uniprot/P07288) | |
| IFNL3 | | | | ab2680 | | | -1.21 | | 13.38 | | 9.0e-03 | | [Q8IZI9](http://www.uniprot.org/uniprot/Q8IZI9) | |
| CD45RO | | | | ab1445 | | | -1.21 | | 12.77 | | 2.3e-02 | | [P08575](http://www.uniprot.org/uniprot/P08575) | |
| ZDHC6 | | | | ab0090 | | | -1.22 | | 12.18 | | 3.0e-02 | | [Q9H6R6](http://www.uniprot.org/uniprot/Q9H6R6) | |
| TNFB | | | | ab1921 | | | -1.23 | | 15.26 | | 1.4e-04 | | [P01374](http://www.uniprot.org/uniprot/P01374) | |
| CDCP1 | | | | ab2813 | | | -1.23 | | 14.75 | | 3.3e-03 | | [Q9H5V8](http://www.uniprot.org/uniprot/Q9H5V8) | |
| SPA9 | | | | ab1034 | | | -1.25 | | 15.07 | | 1.2e-02 | | [Q86WD7](http://www.uniprot.org/uniprot/Q86WD7) | |
| PTN1 | | | | ab1038 | | | -1.25 | | 13.57 | | 2.4e-02 | | [P18031](http://www.uniprot.org/uniprot/P18031) | |
| IC1 | | | | ab2796 | | | -1.27 | | 14.72 | | 3.3e-03 | | [P05155](http://www.uniprot.org/uniprot/P05155) | |
| IL1A | | | | ab2263 | | | -1.27 | | 13.54 | | 3.3e-03 | | [P01583](http://www.uniprot.org/uniprot/P01583) | |
| TR11B | | | | ab1934 | | | -1.27 | | 15.03 | | 7.0e-03 | | [O00300](http://www.uniprot.org/uniprot/O00300) | |
| CDC5L | | | | ab1186 | | | -1.28 | | 14.58 | | 8.9e-04 | | [Q99459](http://www.uniprot.org/uniprot/Q99459) | |
| NRCAM | | | | ab2110 | | | -1.29 | | 12.85 | | 3.0e-03 | | [Q92823](http://www.uniprot.org/uniprot/Q92823) | |
| P53 | | | | ab1517 | | | -1.30 | | 14.85 | | 5.0e-03 | | [P04637](http://www.uniprot.org/uniprot/P04637) | |
| KLK3 | | | | ab1181 | | | -1.30 | | 14.09 | | 7.1e-03 | | [P07288](http://www.uniprot.org/uniprot/P07288) | |
| TFR1 | | | | ab1547 | | | -1.32 | | 12.64 | | 3.8e-02 | | [P02786](http://www.uniprot.org/uniprot/P02786) | |
| CD72 | | | | ab1474 | | | -1.35 | | 14.45 | | 3.3e-03 | | [P21854](http://www.uniprot.org/uniprot/P21854) | |
| CNTF | | | | ab1889 | | | -1.35 | | 10.95 | | 2.4e-02 | | [P26441](http://www.uniprot.org/uniprot/P26441) | |
| NECT4 | | | | ab2713 | | | -1.36 | | 14.68 | | 4.7e-03 | | [Q96NY8](http://www.uniprot.org/uniprot/Q96NY8) | |
| STA5A | | | | ab1150 | | | -1.39 | | 11.37 | | 1.8e-02 | | [P42229](http://www.uniprot.org/uniprot/P42229) | |
| THYG | | | | ab0202 | | | -1.40 | | 14.74 | | 4.7e-03 | | [P01266](http://www.uniprot.org/uniprot/P01266) | |
| AMBP | | | | ab2682 | | | -1.41 | | 13.22 | | 1.8e-02 | | [P02760](http://www.uniprot.org/uniprot/P02760) | |
| GPI8 | | | | ab1317 | | | -1.43 | | 12.95 | | 1.6e-02 | | [Q92643](http://www.uniprot.org/uniprot/Q92643) | |
| ITIH4 | | | | ab2676 | | | -1.43 | | 13.86 | | 3.1e-02 | | [Q14624](http://www.uniprot.org/uniprot/Q14624) | |
| CO2 | | | | ab1216 | | | -1.44 | | 13.40 | | 1.3e-04 | | [P06681](http://www.uniprot.org/uniprot/P06681) | |
| NDKA | | | | ab1270 | | | -1.45 | | 12.87 | | 3.0e-04 | | [P15531](http://www.uniprot.org/uniprot/P15531) | |
| DAF | | | | ab1457 | | | -1.45 | | 13.86 | | 5.4e-03 | | [P08174](http://www.uniprot.org/uniprot/P08174) | |
| FABPL | | | | ab1247 | | | -1.45 | | 12.69 | | 7.3e-03 | | [P07148](http://www.uniprot.org/uniprot/P07148) | |
| ITA2B (CD41a) | | | | ab1539 | | | -1.46 | | 13.20 | | 2.0e-02 | | [P08514](http://www.uniprot.org/uniprot/P08514) | |
| MMP2 | | | | ab2419 | | | -1.46 | | 13.16 | | 2.6e-02 | | [P08253](http://www.uniprot.org/uniprot/P08253) | |
| RS2 | | | | ab1288 | | | -1.47 | | 13.01 | | 4.0e-02 | | [P15880](http://www.uniprot.org/uniprot/P15880) | |
|  | | | | |  | |  | |  | |  | |  | |
| NCAM1 | | | | | ab1458 | | -1.57 | | 13.23 | | 3.7e-03 | | [P13591](http://www.uniprot.org/uniprot/P13591) | |
| IFNL1 | | | | | ab2335 | | -1.58 | | 12.36 | | 4.8e-02 | | [Q8IU54](http://www.uniprot.org/uniprot/Q8IU54) | |
| FCG2B | | | | | ab1803 | | -1.60 | | 12.86 | | 9.8e-05 | | [P31994](http://www.uniprot.org/uniprot/P31994) | |
| AA2AR | | | | | ab1112 | | -1.60 | | 14.27 | | 1.9e-04 | | [P29274](http://www.uniprot.org/uniprot/P29274) | |
| NGF-beta | | | | | ab1602 | | -1.63 | | 12.05 | | 1.2e-02 | | [P01138](http://www.uniprot.org/uniprot/P01138) | |
| MBP | | | | | ab2712 | | -1.66 | | 14.00 | | 1.4e-03 | | [P02686](http://www.uniprot.org/uniprot/P02686) | |
| CD2 | | | | | ab1356 | | -1.70 | | 14.68 | | 2.0e-02 | | [P06729](http://www.uniprot.org/uniprot/P06729) | |
| A1AT | | | | | ab2327 | | -1.73 | | 13.30 | | 5.1e-03 | | [P01009](http://www.uniprot.org/uniprot/P01009) | |
| ITB3 | | | | | ab1258 | | -1.73 | | 11.98 | | 4.3e-02 | | [P05106](http://www.uniprot.org/uniprot/P05106) | |
| CO3 | | | | | ab1623 | | -1.74 | | 14.10 | | 3.2e-03 | | [P01024](http://www.uniprot.org/uniprot/P01024) | |
| S10AD | | | | | ab1829 | | -1.75 | | 13.72 | | 1.3e-02 | | [Q99584](http://www.uniprot.org/uniprot/Q99584) | |
| SIGL9 | | | | | ab2005 | | -1.82 | | 13.20 | | 3.4e-03 | | [Q9Y336](http://www.uniprot.org/uniprot/Q9Y336) | |
| IL2RB | | | | | ab1575 | | -1.86 | | 12.62 | | 5.8e-03 | | [P14784](http://www.uniprot.org/uniprot/P14784) | |
| IFNG | | | | | ab1836 | | -1.90 | | 12.16 | | 2.3e-03 | | [P01579](http://www.uniprot.org/uniprot/P01579) | |
| BIRC7, Isoform 1 | | | | | ab0057 | | -1.91 | | 11.47 | | 4.1e-02 | | [Q96CA5](http://www.uniprot.org/uniprot/Q96CA5) | |
| CD22 | | | | | ab1412 | | -2.00 | | 11.56 | | 2.1e-02 | | [P20273](http://www.uniprot.org/uniprot/P20273) | |
| CEAM1 | | | | | ab2363 | | -2.00 | | 14.27 | | 3.9e-02 | | [P13688](http://www.uniprot.org/uniprot/P13688) | |
| LEG7 | | | | | ab2345 | | -2.10 | | 12.14 | | 3.9e-02 | | [P47929](http://www.uniprot.org/uniprot/P47929) | |
| FGF9 | | | | | ab2313 | | -2.22 | | 11.32 | | 2.3e-02 | | [P31371](http://www.uniprot.org/uniprot/P31371) | |
| LYVE1 | | | | | ab2405 | | -2.24 | | 11.32 | | 7.1e-03 | | [Q9Y5Y7](http://www.uniprot.org/uniprot/Q9Y5Y7) | |
| ITA2B (CD41a) | | | | | ab1563 | | -2.49 | | 12.52 | | 2.7e-02 | | [P08514](http://www.uniprot.org/uniprot/P08514) | |
| ITA2B | | | | | ab1432 | | -2.80 | | 12.46 | | 1.2e-02 | | [P08514](http://www.uniprot.org/uniprot/P08514) | |
| RWD2A | | | | | ab0095 | | -3.85 | | 14.35 | | 7.3e-03 | | [Q9UIY3](http://www.uniprot.org/uniprot/Q9UIY3) | |
